# Supplementary material
Source: PubMed Central journal article supplement (PMC3249761)
Supplement: NIHMS345530-supplement-supplement_1.pdf [file NIHMS345530-supplement-supplement_1.pdf]

Online Supplemental Figure. Vaccine coverage by age and race/ethnicity\*

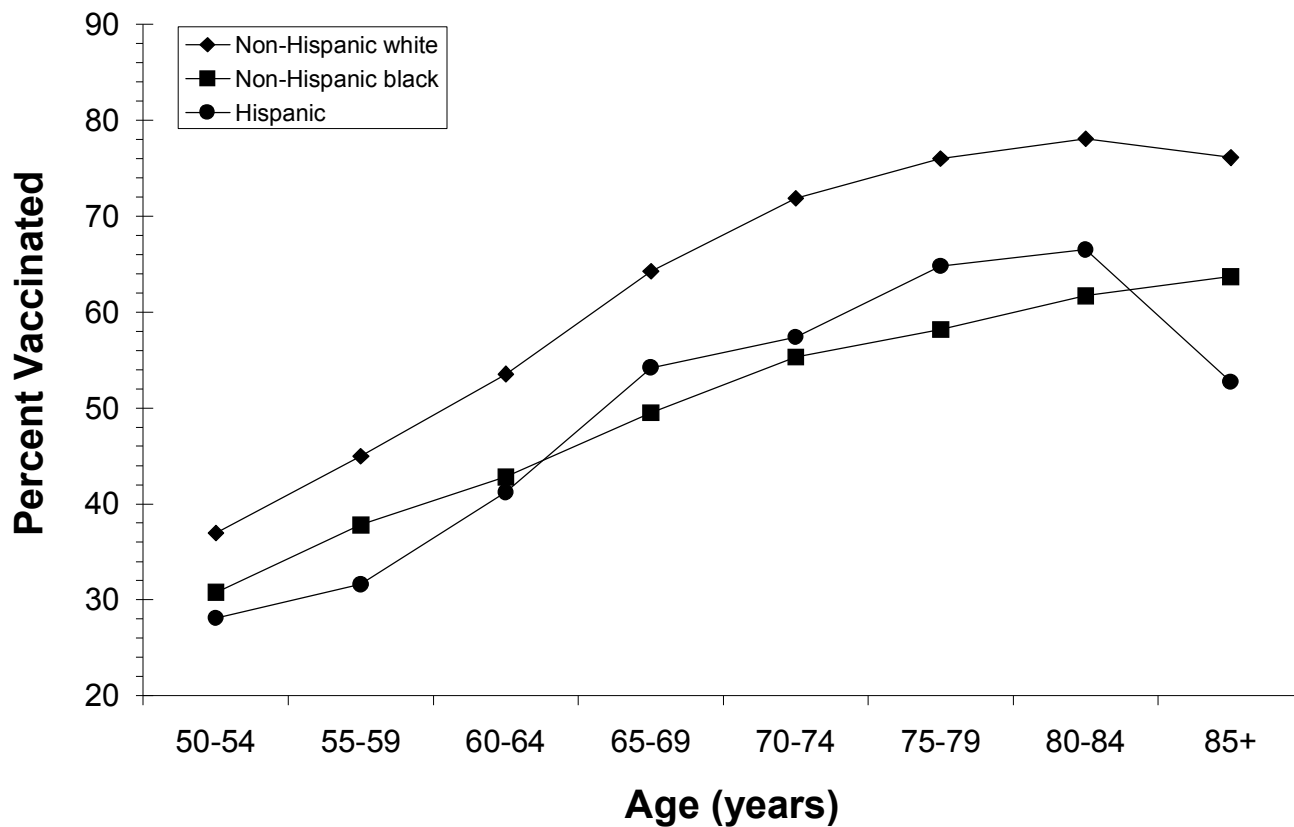

\* Note: Within each age group,  $p < 0.001$  for comparing vaccine prevalence in non-Hispanic whites with non-Hispanic blacks and Hispanics
